# Supplementary material for: “When She Says Daddy”: Black Fathers’ Recidivism following Reentry from Jail
Source: Int J Environ Res Public Health. 2022 Mar 16;19(6):3518. doi: 10.3390/ijerph19063518 (PMC8949043; doi:10.3390/ijerph19063518)
Supplement: Supplementary file 1 [file ijerph-19-03518-s001.zip › ijerph-1615955-supplementary.pdf]

**Table S1 in Supplementary Materials***Nature of Fathers' Offenses (N=84).*

| Type of Offense                          | <i>n for<br/>Main<br/>Offense</i> | %    | <i>n for<br/>Secondary<br/>Offense</i> | %   |
|------------------------------------------|-----------------------------------|------|----------------------------------------|-----|
| Probation technical violation/revocation | 22                                | 26.2 | 2                                      | 2.4 |
| Non-payment of child support             | 15                                | 17.9 | 2                                      | 2.4 |
| Battery/violence                         | 11                                | 13.1 | 0                                      | 0   |
| Possession of drugs                      | 10                                | 11.9 | 0                                      | 0   |
| Disorderly conduct/domestic dispute      | 6                                 | 7.1  | 3                                      | 3.6 |
| DUI/OWI                                  | 5                                 | 6.0  | 0                                      | 0   |
| Theft/fraud/forgery                      | 4                                 | 4.8  | 0                                      | 0   |
| Property damage                          | 5                                 | 6.0  | 5                                      | 6.0 |
| Violence against an officer              | 2                                 | 2.4  | 4                                      | 4.8 |
| No-contact order violation               | 1                                 | 1.2  | 1                                      | 1.2 |
| Reckless endangerment of a child         | 1                                 | 1.2  | 0                                      | 0   |
| Carrying a concealed weapon              | 1                                 | 1.2  | 0                                      | 0   |
| Trespassing                              | 1                                 | 1.2  | 0                                      | 0   |

*Note.* DUI = Driving under the influence, OWI = Operating while under the influence.

If more than one offense occurred, we list the more serious offense.
